# Supplementary material
Source: MDPI journal article supplement (https://www.mdpi.com/2072-4292/13/10/1993)
Supplement: s1 [file s1 › remotesensing-1209959-SI.pdf]

**Table S1.** Mean relative absolute error (MRAE) for LM1\_Q (LM1) and LM2\_QS (LM2), and the significance (P) of the difference between LM1 and LM2 for each target month and each year. Bold numbers indicate the MRAEs are not significantly different between LM1\_Q and LM2\_QS at the 95% significance level.

|      | Nov          |              |               | Dec          |              |               | Jan   |       |   | Feb          |              |               | Mar   |       |        | JFM   |       |        |
|------|--------------|--------------|---------------|--------------|--------------|---------------|-------|-------|---|--------------|--------------|---------------|-------|-------|--------|-------|-------|--------|
|      | LM1          | LM2          | P             | LM1          | LM2          | P             | LM1   | LM2   | P | LM1          | LM2          | P             | LM1   | LM2   | P      | LM1   | LM2   | P      |
| 2002 | 32.78        | 23.66        | 0             | 25.71        | 15.02        | 0             |       |       |   |              |              |               |       |       |        |       |       |        |
| 2003 | 14.66        | 10.11        | 0             | 23.67        | 15.60        | 0             | 40.24 | 4.60  | 0 | <b>21.25</b> | <b>19.25</b> | <b>0.0815</b> | 31.70 | 6.83  | 0      | 30.63 | 5.17  | 0      |
| 2004 | 3.13         | 4.68         | 0             | 6.42         | 3.72         | 0             | 31.08 | 4.50  | 0 | 45.28        | 15.01        | 0             | 26.80 | 5.46  | 0      | 33.30 | 7.79  | 0      |
| 2005 | <b>17.36</b> | <b>16.48</b> | <b>0.3306</b> | <b>29.96</b> | <b>28.22</b> | <b>0.2596</b> | 12.19 | 1.77  | 0 | 16.72        | 5.52         | 0             | 16.79 | 8.16  | 0      | 15.34 | 5.37  | 0      |
| 2006 | 9.34         | 7.75         | 0             | 11.11        | 8.49         | 0             | 19.35 | 14.26 | 0 | 22.47        | 17.27        | 0             | 28.08 | 22.90 | 0.0002 | 23.36 | 18.20 | 0      |
| 2007 | 6.26         | 6.84         | 0.003         | 2.87         | 2.07         | 0.0001        | 16.16 | 5.88  | 0 | 17.89        | 7.06         | 0             | 2.12  | 5.50  | 0      | 10.05 | 1.35  | 0      |
| 2008 | 6.63         | 7.97         | 0.0005        | 3.91         | 6.10         | 0             | 2.63  | 7.27  | 0 | 18.81        | 12.83        | 0             | 1.44  | 3.89  | 0      | 4.10  | 1.17  | 0      |
| 2009 | <b>16.57</b> | <b>17.15</b> | <b>0.1689</b> | <b>23.20</b> | <b>24.14</b> | <b>0.1078</b> | 7.42  | 3.36  | 0 | 7.06         | 15.19        | 0             | 7.52  | 14.27 | 0      | 4.20  | 11.18 | 0      |
| 2010 | 14.76        | 11.35        | 0             | 4.46         | 2.87         | 0             | 8.99  | 12.95 | 0 | 12.00        | 15.95        | 0             | 7.58  | 10.27 | 0      | 9.26  | 12.92 | 0      |
| 2011 | 15.52        | 14.37        | 0.0002        | 21.28        | 19.58        | 0             | 15.09 | 3.07  | 0 | 5.85         | 8.56         | 0             | 2.45  | 9.84  | 0      | 6.99  | 5.51  | 0.0004 |
| 2012 | 3.95         | 2.28         | 0             | 4.16         | 4.82         | 0.0328        | 16.99 | 12.79 | 0 | 17.86        | 13.60        | 0             | 18.37 | 14.90 | 0      | 17.79 | 13.85 | 0      |
| 2013 | 2.02         | 6.03         | 0             | 6.12         | 14.17        | 0             | 26.00 | 7.21  | 0 | 32.80        | 15.28        | 0             | 28.45 | 13.77 | 0      | 29.11 | 12.33 | 0      |
| 2014 | 11.06        | 16.79        | 0             | 6.47         | 2.63         | 0             | 2.62  | 19.06 | 0 | 4.31         | 16.26        | 0             | 3.11  | 12.87 | 0      | 3.18  | 15.67 | 0      |
| 2015 | <b>10.96</b> | <b>10.53</b> | <b>0.1429</b> | <b>1.55</b>  | <b>1.42</b>  | <b>0.4248</b> | 13.94 | 5.79  | 0 | 9.19         | 12.15        | 0             | 4.86  | 13.77 | 0      | 9.00  | 10.67 | 0      |
| 2016 | 4.24         | 1.86         | 0             | 3.19         | 9.87         | 0             | 16.17 | 11.44 | 0 | 12.26        | 7.48         | 0             | 10.82 | 7.39  | 0      | 12.79 | 8.59  | 0      |

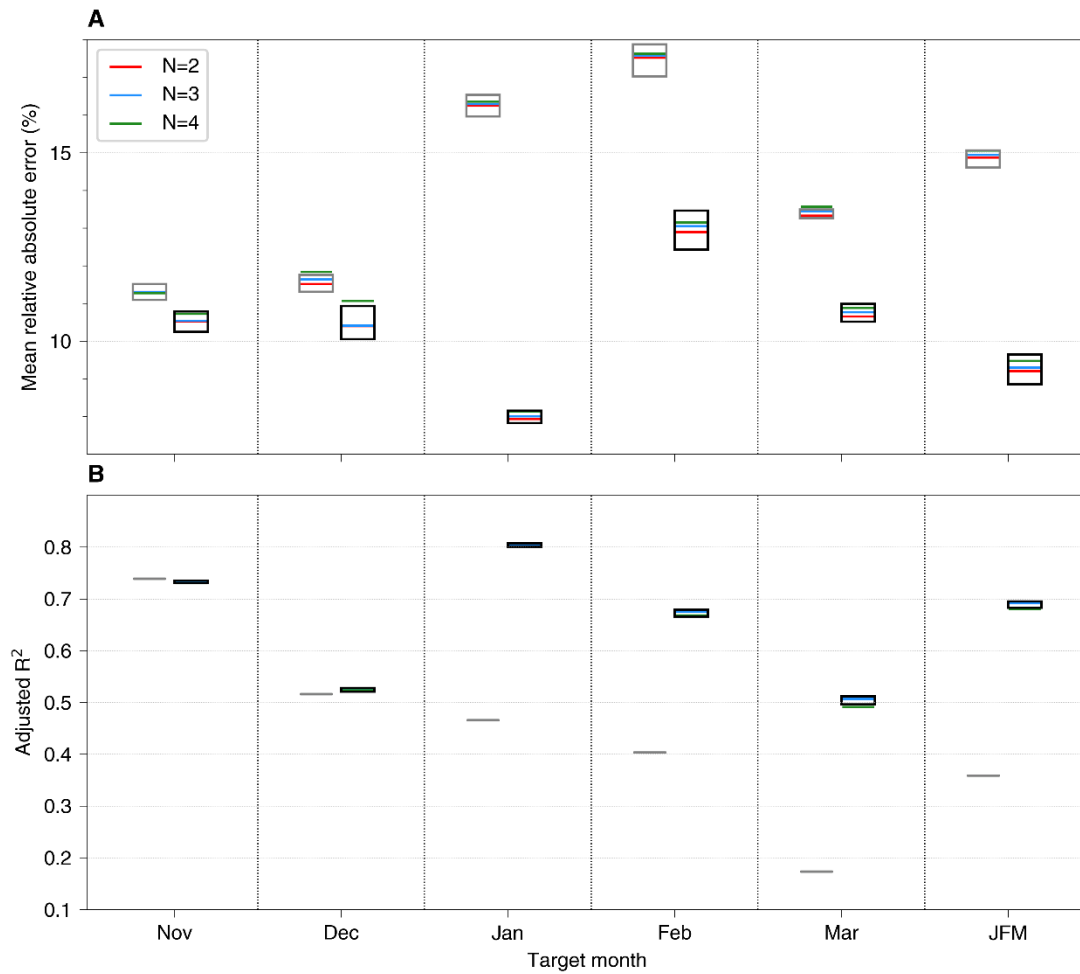

**Figure S1.** Performance of the linear models with different forecast periods. (A) Mean relative absolute errors (MRAEs) of modeled streamflow compared to observations. (B) Adjusted  $R^2$  of the simulations. The bars show the ensemble medians, wherein the red, blue, and green bars are for forecast periods of 2, 3, and 4 years, respectively. The gray and black rectangles show the ranges between the 25<sup>th</sup> and 75<sup>th</sup> percentiles for LM1\_Q and LM2\_QS, respectively. Ranges are not shown for the forecast periods of 3 and 4 years.

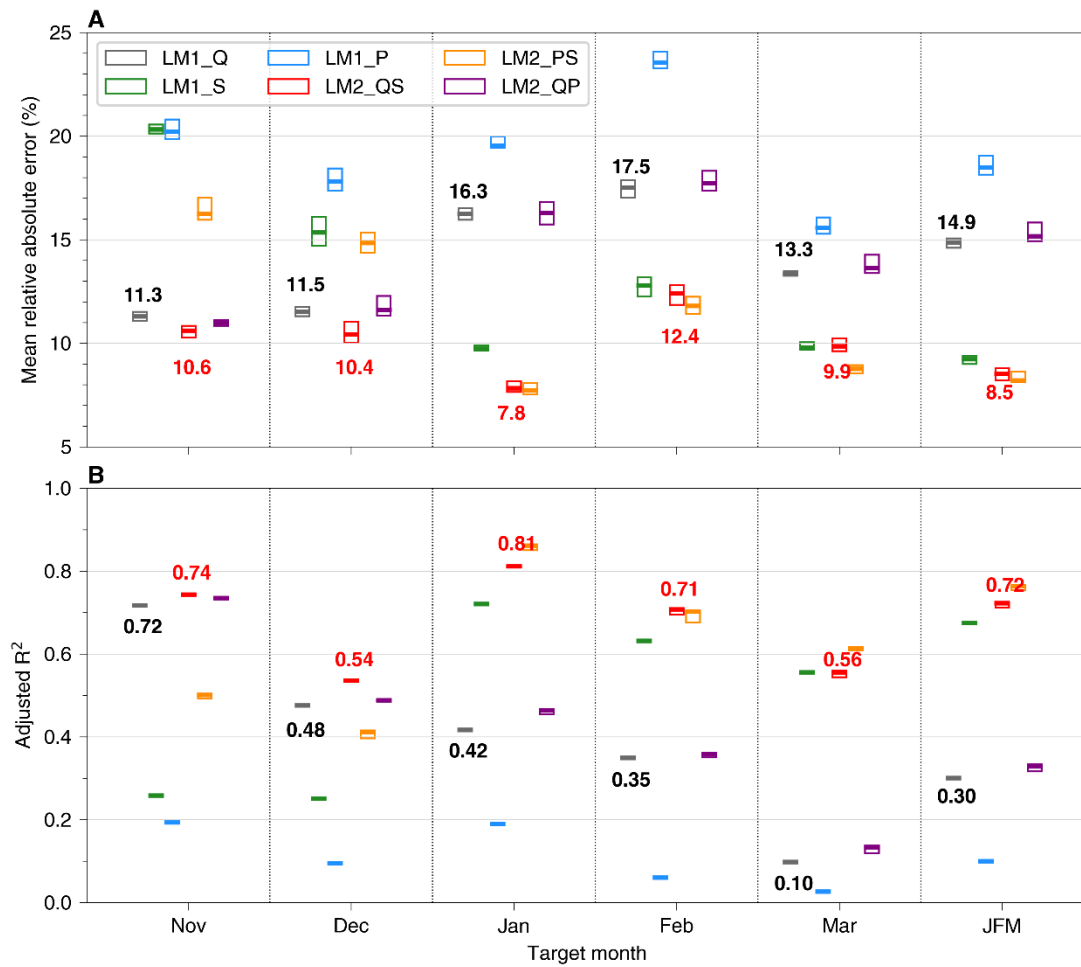

**Figure S2.** Performance of the linear models with the JPL TWSA at the Tangnaihahi stations. (A) Mean relative absolute errors (MRAEs) of modeled streamflow compared to observations. (B) Adjusted  $R^2$  of the simulations. The thick bars show the ensemble medians, while the rectangles show the ranges between the 25<sup>th</sup> and 75<sup>th</sup> percentiles. The MRAEs are averaged over all years for each target month. In the legend, Q, S, and P denote streamflow, TWSA, and precipitation, respectively, as the predictors used in the linear models. The TWSA of the JPL solution is used. Median MRAEs and median adjusted  $R^2$  of LM1\_Q are shown in black and those of LM2\_QS are in red.

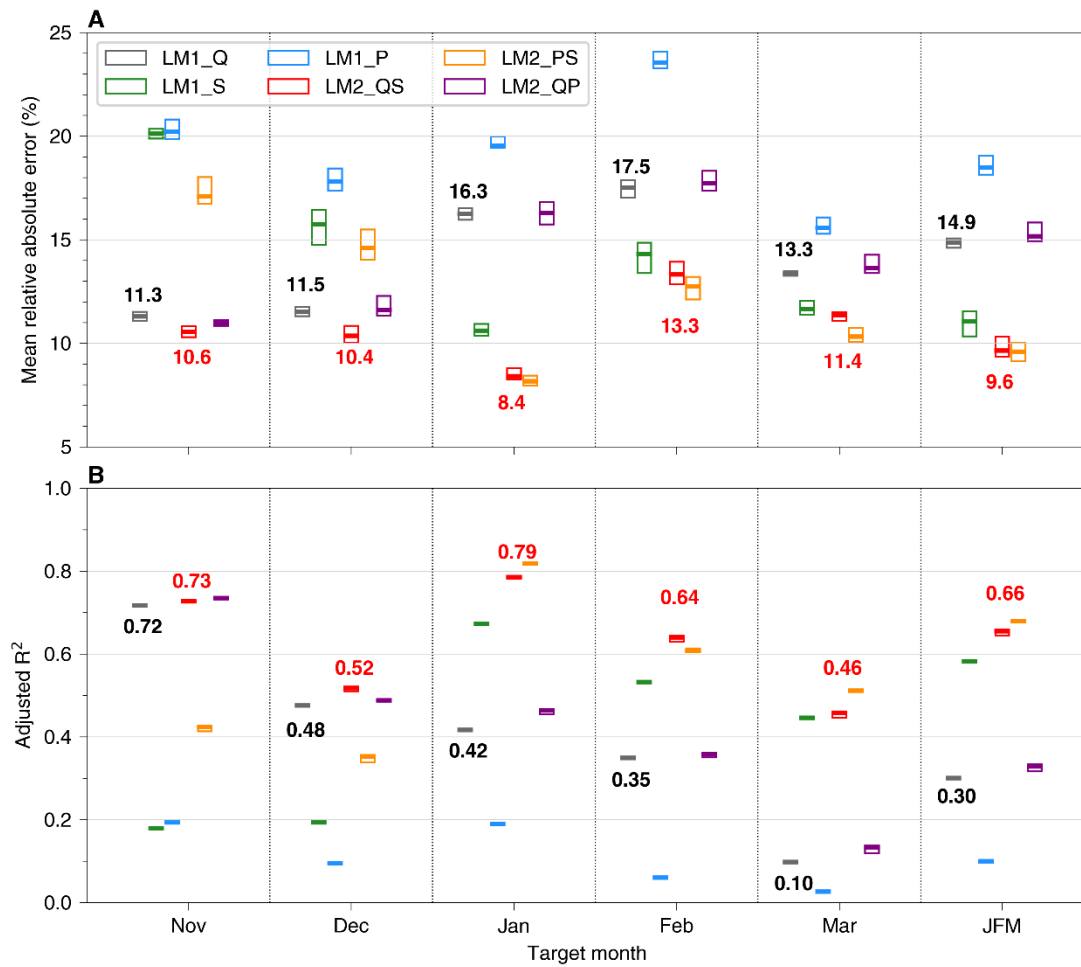

**Figure S3.** Performance of the linear models with the CSR TWSA at the Tangnaihahi stations. (A) Mean relative absolute errors (MRAEs) of modeled streamflow compared to observations. (B) Adjusted  $R^2$  of the simulations. The thick bars show the ensemble medians, while the rectangles show the ranges between the 25<sup>th</sup> and 75<sup>th</sup> percentiles. The MRAEs are averaged over all years for each target month. In the legend, Q, S, and P denote streamflow, TWSA, and precipitation, respectively, as the predictors used in the linear models. The TWSA of the CSR solution is used. Median MRAEs and median adjusted  $R^2$  of LM1\_Q are shown in black and those of LM2\_QS are in red.

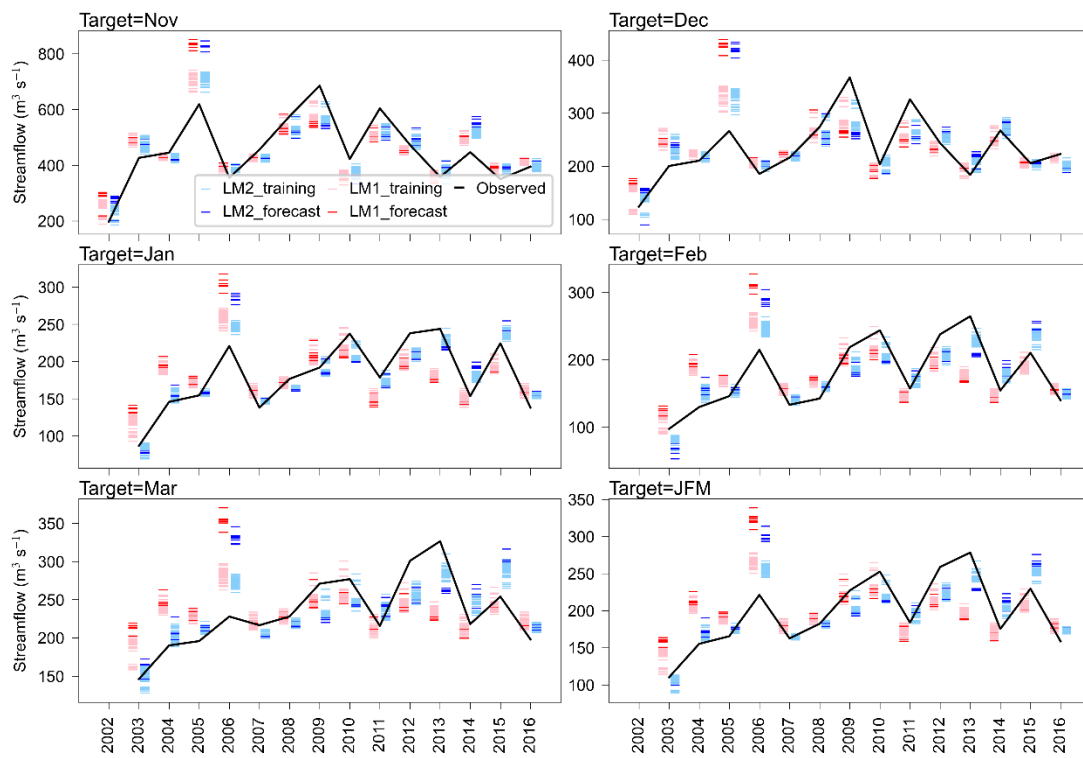

**Figure S4.** Observed monthly streamflow and modeled results with resampled data for each target month in each year.
